# Supplementary material for: Radiographic and clinical outcomes of slope and varus correction anterior closing wedge tibial osteotomy for primary anterior cruciate ligament injuries with steep posterior tibial slope, varus knee deformity, and medial meniscal posterior root tears
Source: Research Square preprint supplement (doi:10.21203/rs.3.rs-1430775/v1), 2022-03-11
Supplement: Supplementary file 1 [file 5322ead7aa7c3d39ee97351b.docx]

Table 2

Pre- and Postoperative Comparisons of Functional Scoresa

|  | Preoperative | Postoperative | P value |
| --- | --- | --- | --- |
| Mean PTS，° | 17.0 | 7.8 | ＜0.05 |
| Mean FTA, ° | 5.4 | -0.6 | ＜0.05 |
| Kellgren-Lawrence grade,  no. of patients |  |  | *n.s* |
| 1 | 4 | 3 |  |
| 2 | 1 | 2 |  |
| 3 | 0 | 0 |  |
| Mean side-to-side difference, mm | 9.2 | 0.6 |  |
| pivot-shift test，  no. of patients |  |  | ＜0.05 |
| 0 | 0 | 5 |  |
| I | 2 | 0 |  |
| II | 3 | 0 |  |
| Mean Lysholm knee score | 48.2 | 93.0 | ＜0.05 |
| Mean IKDC subjective knee score | 48.8 | 89.4 | ＜0.05 |
| Mean Tegner activity score | 4 | 6.8 | ＜0.05 |

a PTS, posterior tibial slope; FTA, femoral tibial angle; IKDC, International Knee Documentation Committee
