# Supplementary material for: Radiographic and clinical outcomes of slope and varus correction anterior closing wedge tibial osteotomy for primary anterior cruciate ligament injuries with steep posterior tibial slope, varus knee deformity, and medial meniscal posterior root tears
Source: Research Square preprint supplement (doi:10.21203/rs.3.rs-1430775/v1), 2022-03-11
Supplement: Supplementary file 2 [file 8e99728438322c5ee42eb56f.docx]

Table 1

Patient Demographics and Characteristicsa

|  | Patient 1 | Patient 2 | Patient 3 | Patient 4 | Patient 5 |
| --- | --- | --- | --- | --- | --- |
| Sex | male | Female | male | male | male |
| Age,y | 21 | 29 | 35 | 30 | 33 |
| BMI | 19.2 | 21.2 | 26.6 | 25.7 | 24.2 |
| Side | right | Right | left | Right | Left |
| Follow-up, mo | 24 | 24 | 27 | 30 | 26 |
| Repair technique for MMPRT | Pull-out | Pull-out | Pull-out | Pull-out | Pull-out |
| Pre PTS,° | 16 | 19 | 17 | 17 | 16 |
| Pre FTA，° | 5 | 5 | 6 | 5 | 7 |
| Kellgren-Lawrence grade |  |  |  |  |  |
| Preoperative | 1 | 1 | 2 | 1 | 1 |

a BMI, body mass index; MMPRT, medial meniscal posterior root tears; PTS, posterior tibial slope; FTA, femoral tibial angle
